# Supplementary material for: The effects of a 20-week exercise program on blood-circulating biomarkers related to brain health in children with overweight or obesity: The ActiveBrains project
Source: bioRxiv or medRxiv preprint supplement (doi:10.1101/2022.07.28.22278146), 2022-07-31
Supplement: Supplementary file [file media-1.pdf]

**Appendix A**

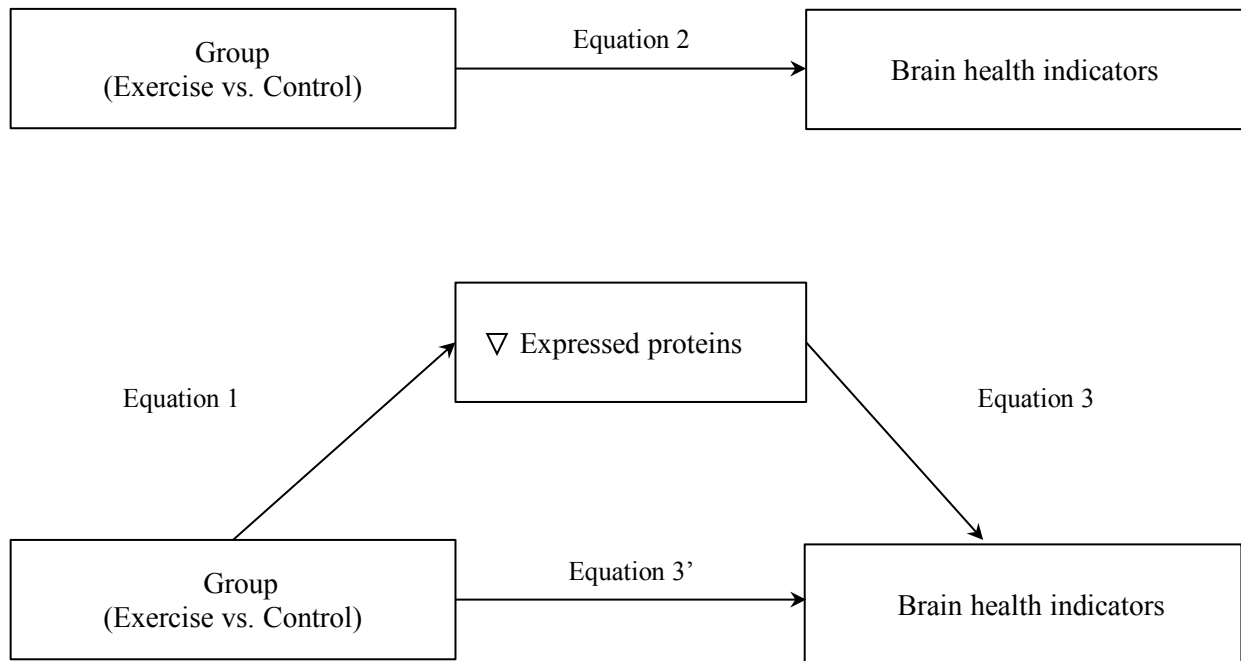

**Fig. S1A.** Visualization of the mediation panel modeling approach. Expressed proteins= Kynureninase, Leukocyte-associated immunoglobulin-like receptor 2, macrophage scavenger receptor type-I, plexin-B3, and Lysosome membrane protein 2. Brain health indicators= brain-derived neurotrophic factor, mental health indicators, cognitive performance indicators, hippocampal volume and function.

**Table S1A.** List of proteins included in the Olink Target Neurology panel.

---

ADP-ribosyl cyclase/cyclic ADP-ribose hydrolase 1 (CD38)  
Alpha-2-macroglobulin receptor-associated protein (Alpha-2-MRAP)  
BDNF/NT-3 growth factors receptor (NTRK2)  
Beta-nerve growth factor (Beta-NGF)  
Bone morphogenetic protein 4 (BMP-4)  
Brevican core protein (BCAN)  
Brorin (VWC2)  
C-type lectin domain family 1 member B (CLEC1B)  
C-type lectin domain family 10 member A (CLEC10A)  
Cadherin-3 (CDH3)  
Cadherin-6 (CDH6)  
Carboxypeptidase A2 (CPA2)  
Carboxypeptidase M (CPM)  
Cathepsin S (CTSS)  
Cell adhesion molecule 3 (CADM3)  
Cell surface glycoprotein CD200 receptor 1 (CD200R1)  
CMRF35-like molecule 1 (CLM-1)  
CMRF35-like molecule 6 (CLM-6)  
Contactin-5 (CNTN5)  
Cytotoxic and regulatory T-cell molecule (CRTAM)  
Dickkopf-related protein 4 (Dkk-4)  
Dipeptidyl peptidase 1 (CTSC)  
Disintegrin and metalloproteinase domain-containing protein 22 (ADAM 22)  
Disintegrin and metalloproteinase domain-containing protein 23 (ADAM 23)  
Draxin (DRAXIN)  
Ephrin type-B receptor 6 (EPHB6)  
Ephrin-A4 (EFNA4)  
Epithelial discoidin domain-containing receptor 1 (DDR1)  
Ezrin (EZR)  
Fc receptor-like protein 2 (FcRL2)  
Galectin-8 (gal-8)  
GDNF family receptor alpha-1 (GFR-alpha-1)  
GDNF family receptor alpha-3 (GDNFR-alpha-3)  
Glial cell line-derived neurotrophic factor (GDNF)  
Glypican-5 (GPC5)  
Granulocyte Colony-Stimulating Factor (G-CSF)  
Granulocyte-macrophage colony-stimulating factor receptor subunit alpha (GM-CSF-R-alpha)  
Granzyme A (GZMA)  
Growth/differentiation factor 8 (GDF-8)  
Hydroxyacylglutathione hydrolase, mitochondrial (HAGH)  
Interleukin-12 subunit beta, Interleukin-12 subunit alpha (IL-12B, IL-12A)  
Interleukin-5 receptor subunit alpha (IL-5R-alpha)  
Junctional adhesion molecule B (JAM-B)  
Kynureninase (KYNU)  
Latexin (LXN)  
Layilin (LAYN)  
Leucine-rich repeat transmembrane protein FLRT2 (FLRT2)  
Leukocyte-associated immunoglobulin-like receptor 2 (LAIR-2)  
Linker for activation of T-cells family member 1 (LAT)  
Lysosome membrane protein 2 (SCARB2)  
Macrophage scavenger receptor types I and II (MSR1)  
MAM domain-containing glycosylphosphatidylinositol anchor protein 1 (MDGA1)  
Matrilin-3 (MATN3)  
Mesencephalic astrocyte-derived neurotrophic factor (MANF)  
Microtubule-associated protein tau (MAPT)  
N-acyl ethanolamine-hydrolyzing acid amidase (NAAA)  
Neprilysin (NEP)  
Netrin receptor UNC5C (UNC5C)

## Exercise and neurology biomarkers in childhood

Neuroblastoma suppressor of tumorigenicity 1 (NBL1)  
Neurocan core protein (NCAN)  
Neuronal cell adhesion molecule (Nr-CAM)  
Neuropilin-2 (NRP2)  
Neutral ceramidase (N-CDase)  
Nicotinamide/nicotinic acid mononucleotide adenylyltransferase 1 (NMNAT1)  
NKG2D ligand 2 (N2DL-2)  
NT-3 growth factor receptor (NTRK3)  
OX-2 membrane glycoprotein (CD200)  
Platelet-derived growth factor receptor alpha (PDGF-R-alpha)  
Plexin-B1 (PLXNB1)  
Plexin-B3 (PLXNB3)  
Poliovirus receptor (PVR)  
Protogenin (PRTG)  
R-spondin-1 (RSPO1)  
Repulsive guidance molecule A (RGMA)  
RGM domain family member B (RGMB)  
Roundabout homolog 2 (ROBO2)  
Scavenger receptor class A member 5 (SCARA5)  
Scavenger receptor class F member 2 (SCARF2)  
Secreted frizzled-related protein 3 (sFRP-3)  
Serine/threonine-protein kinase receptor R3 (SKR3)  
Sialic acid-binding Ig-like lectin 9 (Siglec-9)  
Sialoadhesin (SIGLEC1)  
SPARC-related modular calcium-binding protein 2 (SMOC2)  
Sphingomyelin phosphodiesterase (SMPD1)  
Tenascin-R (TN-R)  
Testican-1 (SPOCK1)  
Thy-1 membrane glycoprotein (THY 1)  
Transmembrane protease serine 5 (TMPRSS5)  
Tumor necrosis factor receptor superfamily member 12A (TNFRSF12A)  
Tumor necrosis factor receptor superfamily member 21 (TNFRSF21)  
Tumor necrosis factor receptor superfamily member 27 (EDA2R)  
WAP, Kazal, immunoglobulin, Kunitz and NTR domain-containing protein 1 (WFIKKN1)

---

**Table S2A.** Baseline partial correlations adjusted for sex and peak height velocity between BDNF and the 6 differential expressed proteins between exercise and control group in children with overweight/obesity.

|      |          | SCARB2 | MSR1  | KYNU   | LAIR  | CPA2  | PLXNB3 |
|------|----------|--------|-------|--------|-------|-------|--------|
| BDNF | <i>r</i> | -0.043 | 0.001 | 0.563  | 0.018 | 0.146 | 0.757  |
|      | <i>p</i> | 0.705  | 0.990 | <0.001 | 0.877 | 0.202 | <0.001 |

Abbreviations: BDNF= brain-derived neurotrophic factor, CPA2=Carboxypeptidase A2, KYNU=Kynureninase, LAIR2= Leukocyte-associated immunoglobulin-like receptor 2, MSR1= macrophage scavenger receptor type-I, PLXNB3=plexin-B3, SCARB2= Lysosome membrane protein 2.

Exercise and neurology biomarkers in childhood

**Table S3A.** Per protocol effects of the ActiveBrains intervention on raw and z Score post-intervention neurology-related proteins (n=81)

|                   | Intervention group     | Control group         | Differences between groups | <i>p</i>     | <i>p<sub>FDR</sub></i> |
|-------------------|------------------------|-----------------------|----------------------------|--------------|------------------------|
| <b>ADAM22</b>     |                        |                       |                            |              |                        |
| Raw score         | 4.99 (4.91 to 5.07)    | 4.98 (4.9 to 5.06)    | 0.01 (-0.1 to 0.12)        | 0.887        | 0.972                  |
| z-score           | 0.09 (-0.19 to 0.36)   | 0.06 (-0.23 to 0.34)  | 0.03 (-0.37 to 0.42)       |              |                        |
| <b>ADAM23</b>     |                        |                       |                            |              |                        |
| Raw score         | 4.95 (4.88 to 5.02)    | 4.91 (4.84 to 4.99)   | 0.04 (-0.07 to 0.14)       | 0.475        | 0.891                  |
| z-score           | -0.07 (-0.3 to 0.15)   | -0.19 (-0.43 to 0.04) | 0.12 (-0.21 to 0.45)       |              |                        |
| <b>Alpha2MRAP</b> |                        |                       |                            |              |                        |
| Raw score         | 8.02 (7.84 to 8.19)    | 8.04 (7.86 to 8.22)   | -0.03 (-0.28 to 0.23)      | 0.834        | 0.967                  |
| z-score           | -0.2 (-0.38 to -0.02)  | -0.17 (-0.36 to 0.02) | -0.03 (-0.29 to 0.24)      |              |                        |
| <b>BCAN</b>       |                        |                       |                            |              |                        |
| Raw score         | 5.04 (4.98 to 5.1)     | 5.08 (5.02 to 5.15)   | -0.04 (-0.13 to 0.05)      | 0.359        | 0.884                  |
| z-score           | -0.32 (-0.52 to -0.12) | -0.18 (-0.39 to 0.03) | -0.14 (-0.43 to 0.16)      |              |                        |
| <b>BetaNGF</b>    |                        |                       |                            |              |                        |
| Raw score         | 1.28 (1.24 to 1.32)    | 1.29 (1.25 to 1.33)   | -0.01 (-0.06 to 0.05)      | 0.776        | 0.962                  |
| z-score           | -0.21 (-0.4 to -0.02)  | -0.17 (-0.37 to 0.02) | -0.04 (-0.31 to 0.23)      |              |                        |
| <b>BMP4</b>       |                        |                       |                            |              |                        |
| Raw score         | 4.45 (4.37 to 4.53)    | 4.45 (4.37 to 4.53)   | 0 (-0.11 to 0.11)          | 0.972        | 0.995                  |
| z-score           | 0.02 (-0.24 to 0.29)   | 0.03 (-0.24 to 0.3)   | -0.01 (-0.39 to 0.38)      |              |                        |
| <b>CADM3</b>      |                        |                       |                            |              |                        |
| Raw score         | 4.82 (4.74 to 4.9)     | 4.83 (4.74 to 4.91)   | -0.01 (-0.13 to 0.11)      | 0.885        | 0.972                  |
| z-score           | -0.15 (-0.34 to 0.04)  | -0.13 (-0.33 to 0.06) | -0.02 (-0.29 to 0.25)      |              |                        |
| <b>CD200</b>      |                        |                       |                            |              |                        |
| Raw score         | 7.06 (7 to 7.12)       | 7.06 (6.99 to 7.12)   | 0 (-0.09 to 0.09)          | 0.995        | 0.995                  |
| z-score           | -0.12 (-0.36 to 0.13)  | -0.12 (-0.37 to 0.13) | 0 (-0.35 to 0.35)          |              |                        |
| <b>CD200R1</b>    |                        |                       |                            |              |                        |
| Raw score         | 5.13 (5.08 to 5.18)    | 5.17 (5.12 to 5.22)   | -0.04 (-0.1 to 0.03)       | 0.291        | 0.884                  |
| z-score           | -0.18 (-0.33 to -0.02) | -0.06 (-0.22 to 0.1)  | -0.12 (-0.34 to 0.1)       |              |                        |
| <b>CD38</b>       |                        |                       |                            |              |                        |
| Raw score         | 5.95 (5.88 to 6.01)    | 6 (5.93 to 6.07)      | -0.05 (-0.15 to 0.05)      | 0.301        | 0.884                  |
| z-score           | -0.32 (-0.62 to -0.02) | -0.09 (-0.4 to 0.21)  | -0.22 (-0.65 to 0.2)       |              |                        |
| <b>CDH3</b>       |                        |                       |                            |              |                        |
| Raw score         | 8.05 (7.98 to 8.12)    | 8.12 (8.04 to 8.19)   | -0.07 (-0.17 to 0.03)      | 0.190        | 0.884                  |
| z-score           | -0.12 (-0.33 to 0.09)  | 0.09 (-0.14 to 0.31)  | -0.2 (-0.51 to 0.1)        |              |                        |
| <b>CDH6</b>       |                        |                       |                            |              |                        |
| Raw score         | 5.4 (5.36 to 5.45)     | 5.38 (5.34 to 5.43)   | 0.02 (-0.05 to 0.08)       | 0.605        | 0.891                  |
| z-score           | -0.09 (-0.36 to 0.19)  | -0.19 (-0.47 to 0.1)  | 0.1 (-0.29 to 0.5)         |              |                        |
| <b>CLEC10A</b>    |                        |                       |                            |              |                        |
| Raw score         | 5.61 (5.53 to 5.7)     | 5.69 (5.6 to 5.78)    | -0.08 (-0.2 to 0.05)       | 0.212        | 0.884                  |
| z-score           | -0.13 (-0.36 to 0.09)  | 0.07 (-0.16 to 0.3)   | -0.2 (-0.53 to 0.12)       |              |                        |
| <b>CLEC1B</b>     |                        |                       |                            |              |                        |
| Raw score         | 9.8 (9.54 to 10.07)    | 9.9 (9.63 to 10.18)   | -0.1 (-0.48 to 0.28)       | 0.600        | 0.891                  |
| z-score           | -0.32 (-0.55 to -0.09) | -0.23 (-0.47 to 0.01) | -0.09 (-0.42 to 0.24)      |              |                        |
| <b>CLM1</b>       |                        |                       |                            |              |                        |
| Raw score         | 6.3 (6.21 to 6.38)     | 6.33 (6.24 to 6.42)   | -0.03 (-0.15 to 0.1)       | 0.642        | 0.891                  |
| z-score           | -0.08 (-0.22 to 0.07)  | -0.03 (-0.18 to 0.12) | -0.05 (-0.26 to 0.16)      |              |                        |
| <b>CLM6</b>       |                        |                       |                            |              |                        |
| Raw score         | 5.79 (5.75 to 5.83)    | 5.83 (5.79 to 5.87)   | -0.04 (-0.1 to 0.01)       | 0.134        | 0.884                  |
| z-score           | -0.2 (-0.36 to -0.04)  | -0.03 (-0.2 to 0.14)  | -0.17 (-0.41 to 0.06)      |              |                        |
| <b>CNTN5</b>      |                        |                       |                            |              |                        |
| Raw score         | 6.2 (6.11 to 6.28)     | 6.16 (6.07 to 6.25)   | 0.03 (-0.09 to 0.16)       | 0.583        | 0.891                  |
| z-score           | -0.24 (-0.46 to -0.02) | -0.33 (-0.56 to -0.1) | 0.09 (-0.23 to 0.41)       |              |                        |
| <b>CPA2</b>       |                        |                       |                            |              |                        |
| Raw score         | 9.91 (9.79 to 10.04)   | 10.11 (9.98 to 10.25) | -0.2 (-0.39 to -0.01)      | <b>0.040</b> | 0.601                  |
| z-score           | -0.12 (-0.33 to 0.08)  | 0.19 (-0.02 to 0.41)  | -0.32 (-0.62 to -0.01)     |              |                        |
| <b>CPM</b>        |                        |                       |                            |              |                        |
| Raw score         | 7.06 (7.01 to 7.1)     | 7.05 (7 to 7.09)      | 0.01 (-0.05 to 0.07)       | 0.807        | 0.966                  |
| z-score           | -0.01 (-0.19 to 0.17)  | -0.04 (-0.23 to 0.14) | 0.03 (-0.23 to 0.29)       |              |                        |
| <b>CRTAM</b>      |                        |                       |                            |              |                        |
| Raw score         | 5.92 (5.85 to 5.99)    | 5.95 (5.88 to 6.02)   | -0.03 (-0.13 to 0.07)      | 0.584        | 0.891                  |
| z-score           | -0.21 (-0.35 to -0.07) | -0.15 (-0.3 to -0.01) | -0.06 (-0.26 to 0.14)      |              |                        |
| <b>CTSC</b>       |                        |                       |                            |              |                        |
| Raw score         | 2.95 (2.85 to 3.04)    | 2.86 (2.76 to 2.96)   | 0.09 (-0.05 to 0.22)       | 0.214        | 0.884                  |
| z-score           | 0 (-0.19 to 0.19)      | -0.17 (-0.36 to 0.02) | 0.17 (-0.1 to 0.44)        |              |                        |

Exercise and neurology biomarkers in childhood

**Table S3A.** (Continued)

|             |                        |                        |                       |       |       |
|-------------|------------------------|------------------------|-----------------------|-------|-------|
| CTSS        |                        |                        |                       |       |       |
| Raw score   | 5.67 (5.62 to 5.72)    | 5.61 (5.56 to 5.66)    | 0.06 (-0.01 to 0.13)  | 0.097 | 0.884 |
| z-score     | 0.2 (-0.05 to 0.44)    | -0.1 (-0.36 to 0.15)   | 0.3 (-0.06 to 0.65)   |       |       |
| DDR1        |                        |                        |                       |       |       |
| Raw score   | 7.74 (7.69 to 7.78)    | 7.75 (7.71 to 7.8)     | -0.02 (-0.08 to 0.05) | 0.612 | 0.891 |
| z-score     | -0.25 (-0.49 to -0.01) | -0.16 (-0.41 to 0.08)  | -0.09 (-0.43 to 0.26) |       |       |
| Dkk4        |                        |                        |                       |       |       |
| Raw score   | 2.36 (2.24 to 2.49)    | 2.5 (2.37 to 2.63)     | -0.14 (-0.32 to 0.04) | 0.133 | 0.884 |
| z-score     | -0.1 (-0.44 to 0.25)   | 0.29 (-0.07 to 0.64)   | -0.38 (-0.89 to 0.12) |       |       |
| DRAXIN      |                        |                        |                       |       |       |
| Raw score   | 4.24 (4.15 to 4.34)    | 4.25 (4.15 to 4.34)    | 0 (-0.13 to 0.13)     | 0.982 | 0.995 |
| z-score     | -0.09 (-0.28 to 0.11)  | -0.09 (-0.29 to 0.12)  | 0 (-0.29 to 0.28)     |       |       |
| EDA2R       |                        |                        |                       |       |       |
| Raw score   | 3.74 (3.67 to 3.82)    | 3.77 (3.69 to 3.84)    | -0.03 (-0.13 to 0.08) | 0.643 | 0.891 |
| z-score     | 0.18 (-0.04 to 0.4)    | 0.26 (0.03 to 0.49)    | -0.07 (-0.39 to 0.24) |       |       |
| EFNA4       |                        |                        |                       |       |       |
| Raw score   | 3.52 (3.47 to 3.56)    | 3.57 (3.52 to 3.62)    | -0.05 (-0.12 to 0.02) | 0.150 | 0.884 |
| z-score     | -0.16 (-0.4 to 0.08)   | 0.09 (-0.15 to 0.34)   | -0.25 (-0.6 to 0.09)  |       |       |
| EPHB6       |                        |                        |                       |       |       |
| Raw score   | 4.92 (4.86 to 4.97)    | 4.93 (4.87 to 4.98)    | -0.01 (-0.09 to 0.07) | 0.817 | 0.966 |
| z-score     | -0.26 (-0.46 to -0.06) | -0.22 (-0.43 to -0.02) | -0.03 (-0.32 to 0.26) |       |       |
| EZR         |                        |                        |                       |       |       |
| Raw score   | 5.11 (5.04 to 5.18)    | 5.16 (5.09 to 5.24)    | -0.06 (-0.16 to 0.05) | 0.279 | 0.884 |
| z-score     | 0.05 (-0.2 to 0.3)     | 0.25 (-0.01 to 0.51)   | -0.2 (-0.57 to 0.17)  |       |       |
| FcRL2       |                        |                        |                       |       |       |
| Raw score   | 5.35 (5.28 to 5.41)    | 5.42 (5.36 to 5.49)    | -0.08 (-0.17 to 0.02) | 0.104 | 0.884 |
| z-score     | -0.2 (-0.36 to -0.05)  | -0.02 (-0.18 to 0.14)  | -0.19 (-0.41 to 0.04) |       |       |
| FLRT2       |                        |                        |                       |       |       |
| Raw score   | 3.23 (3.16 to 3.3)     | 3.25 (3.18 to 3.32)    | -0.02 (-0.12 to 0.07) | 0.655 | 0.891 |
| z-score     | -0.09 (-0.45 to 0.26)  | 0.02 (-0.35 to 0.4)    | -0.12 (-0.64 to 0.4)  |       |       |
| gal8        |                        |                        |                       |       |       |
| Raw score   | 5.7 (5.58 to 5.82)     | 5.74 (5.61 to 5.86)    | -0.04 (-0.21 to 0.14) | 0.682 | 0.900 |
| z-score     | -0.27 (-0.4 to -0.14)  | -0.23 (-0.37 to -0.1)  | -0.04 (-0.22 to 0.15) |       |       |
| GCP5        |                        |                        |                       |       |       |
| Raw score   | 5.32 (5.17 to 5.47)    | 5.24 (5.09 to 5.4)     | 0.08 (-0.14 to 0.29)  | 0.475 | 0.891 |
| z-score     | -0.18 (-0.41 to 0.04)  | -0.3 (-0.54 to -0.07)  | 0.12 (-0.21 to 0.44)  |       |       |
| GCSF        |                        |                        |                       |       |       |
| Raw score   | 3.62 (3.46 to 3.78)    | 3.73 (3.56 to 3.89)    | -0.11 (-0.34 to 0.12) | 0.347 | 0.884 |
| z-score     | -0.27 (-0.53 to -0.01) | -0.09 (-0.36 to 0.18)  | -0.18 (-0.55 to 0.2)  |       |       |
| GDF8        |                        |                        |                       |       |       |
| Raw score   | 4.26 (4.15 to 4.36)    | 4.22 (4.11 to 4.32)    | 0.04 (-0.11 to 0.19)  | 0.591 | 0.891 |
| z-score     | 0.12 (-0.16 to 0.39)   | 0.01 (-0.28 to 0.29)   | 0.11 (-0.29 to 0.5)   |       |       |
| GDNF        |                        |                        |                       |       |       |
| Raw score   | 1.36 (1.27 to 1.45)    | 1.36 (1.27 to 1.46)    | 0 (-0.13 to 0.13)     | 0.995 | 0.995 |
| z-score     | 0.02 (-0.35 to 0.39)   | 0.02 (-0.37 to 0.4)    | 0 (-0.53 to 0.53)     |       |       |
| GDNFRalpha3 |                        |                        |                       |       |       |
| Raw score   | 5.54 (5.48 to 5.61)    | 5.54 (5.47 to 5.6)     | 0.01 (-0.08 to 0.1)   | 0.840 | 0.967 |
| z-score     | -0.06 (-0.29 to 0.17)  | -0.09 (-0.33 to 0.15)  | 0.03 (-0.3 to 0.37)   |       |       |
| GFRalpha1   |                        |                        |                       |       |       |
| Raw score   | 7.56 (7.5 to 7.62)     | 7.56 (7.5 to 7.62)     | 0 (-0.09 to 0.08)     | 0.951 | 0.995 |
| z-score     | -0.12 (-0.35 to 0.12)  | -0.11 (-0.35 to 0.14)  | -0.01 (-0.35 to 0.33) |       |       |
| GMCSFRalpha |                        |                        |                       |       |       |
| Raw score   | 6.1 (6.04 to 6.16)     | 6.12 (6.06 to 6.18)    | -0.02 (-0.1 to 0.06)  | 0.632 | 0.891 |
| z-score     | -0.08 (-0.17 to 0)     | -0.05 (-0.14 to 0.04)  | -0.03 (-0.15 to 0.09) |       |       |
| GZMA        |                        |                        |                       |       |       |
| Raw score   | 6.35 (6.23 to 6.47)    | 6.45 (6.33 to 6.57)    | -0.1 (-0.27 to 0.07)  | 0.251 | 0.884 |
| z-score     | -0.1 (-0.32 to 0.11)   | 0.07 (-0.15 to 0.3)    | -0.18 (-0.49 to 0.13) |       |       |
| HAGH        |                        |                        |                       |       |       |
| Raw score   | 6.29 (5.96 to 6.61)    | 6.14 (5.8 to 6.48)     | 0.15 (-0.32 to 0.62)  | 0.536 | 0.891 |
| z-score     | 1.1 (0.62 to 1.58)     | 0.88 (0.39 to 1.38)    | 0.22 (-0.48 to 0.91)  |       |       |
| IL12        |                        |                        |                       |       |       |
| Raw score   | 9.05 (8.95 to 9.15)    | 9.12 (9.02 to 9.22)    | -0.07 (-0.22 to 0.07) | 0.291 | 0.884 |
| z-score     | -0.05 (-0.24 to 0.14)  | 0.1 (-0.1 to 0.29)     | -0.14 (-0.41 to 0.13) |       |       |
| IL5Ralpha   |                        |                        |                       |       |       |
| Raw score   | 3.27 (3.18 to 3.36)    | 3.35 (3.26 to 3.44)    | -0.08 (-0.21 to 0.05) | 0.235 | 0.884 |
| z-score     | -0.07 (-0.21 to 0.07)  | 0.05 (-0.09 to 0.2)    | -0.12 (-0.33 to 0.08) |       |       |

Exercise and neurology biomarkers in childhood

**Table S3A.** (Continued)

|                   |                        |                        |                        |              |       |
|-------------------|------------------------|------------------------|------------------------|--------------|-------|
| <b>JAMB</b>       |                        |                        |                        |              |       |
| Raw score         | 8.32 (8.25 to 8.38)    | 8.33 (8.26 to 8.4)     | -0.01 (-0.11 to 0.09)  | 0.810        | 0.966 |
| z-score           | -0.06 (-0.3 to 0.18)   | -0.02 (-0.27 to 0.23)  | -0.04 (-0.39 to 0.31)  |              |       |
| <b>KYNU</b>       |                        |                        |                        |              |       |
| Raw score         | 8.85 (8.71 to 8.98)    | 9.12 (8.98 to 9.26)    | -0.28 (-0.47 to -0.08) | <b>0.005</b> | 0.166 |
| z-score           | -0.41 (-0.61 to -0.21) | 0.01 (-0.2 to 0.22)    | -0.42 (-0.71 to -0.13) |              |       |
| <b>LAIR2</b>      |                        |                        |                        |              |       |
| Raw score         | 4.72 (4.6 to 4.85)     | 4.92 (4.8 to 5.05)     | -0.2 (-0.38 to -0.02)  | <b>0.028</b> | 0.517 |
| z-score           | -0.13 (-0.24 to -0.01) | 0.06 (-0.06 to 0.18)   | -0.19 (-0.35 to -0.02) |              |       |
| <b>LAT</b>        |                        |                        |                        |              |       |
| Raw score         | 5.73 (5.4 to 6.06)     | 5.94 (5.6 to 6.28)     | -0.21 (-0.69 to 0.26)  | 0.372        | 0.891 |
| z-score           | -0.24 (-0.48 to 0)     | -0.09 (-0.33 to 0.16)  | -0.15 (-0.49 to 0.19)  |              |       |
| <b>LAYN</b>       |                        |                        |                        |              |       |
| Raw score         | 5.77 (5.7 to 5.84)     | 5.8 (5.72 to 5.87)     | -0.03 (-0.13 to 0.07)  | 0.607        | 0.891 |
| z-score           | 0.04 (-0.19 to 0.28)   | 0.13 (-0.11 to 0.38)   | -0.09 (-0.43 to 0.25)  |              |       |
| <b>LXN</b>        |                        |                        |                        |              |       |
| Raw score         | 2.41 (2.27 to 2.56)    | 2.33 (2.18 to 2.47)    | 0.09 (-0.12 to 0.29)   | 0.394        | 0.891 |
| z-score           | 0.65 (0.09 to 1.22)    | 0.3 (-0.29 to 0.89)    | 0.35 (-0.47 to 1.17)   |              |       |
| <b>MANF</b>       |                        |                        |                        |              |       |
| Raw score         | 6.36 (6 to 6.73)       | 6.75 (6.37 to 7.13)    | -0.39 (-0.92 to 0.14)  | 0.152        | 0.884 |
| z-score           | -0.26 (-0.58 to 0.06)  | 0.08 (-0.26 to 0.41)   | -0.34 (-0.8 to 0.13)   |              |       |
| <b>MATN3</b>      |                        |                        |                        |              |       |
| Raw score         | 12.97 (12.92 to 13.03) | 12.96 (12.91 to 13.02) | 0.01 (-0.07 to 0.09)   | 0.861        | 0.967 |
| z-score           | 0 (-0.29 to 0.3)       | -0.03 (-0.34 to 0.28)  | 0.04 (-0.39 to 0.47)   |              |       |
| <b>MDGA1</b>      |                        |                        |                        |              |       |
| Raw score         | 5.05 (4.96 to 5.14)    | 5.05 (4.95 to 5.14)    | 0.01 (-0.12 to 0.13)   | 0.932        | 0.995 |
| z-score           | -0.04 (-0.18 to 0.09)  | -0.05 (-0.19 to 0.08)  | 0.01 (-0.18 to 0.2)    |              |       |
| <b>MSR1</b>       |                        |                        |                        |              |       |
| Raw score         | 6.78 (6.72 to 6.84)    | 6.93 (6.87 to 6.99)    | -0.15 (-0.23 to -0.06) | <b>0.001</b> | 0.077 |
| z-score           | -0.28 (-0.4 to -0.15)  | 0.04 (-0.09 to 0.17)   | -0.32 (-0.5 to -0.14)  |              |       |
| <b>N2DL2</b>      |                        |                        |                        |              |       |
| Raw score         | 3.87 (3.8 to 3.94)     | 3.9 (3.83 to 3.97)     | -0.03 (-0.13 to 0.07)  | 0.521        | 0.891 |
| z-score           | 0.03 (-0.2 to 0.26)    | 0.14 (-0.1 to 0.37)    | -0.11 (-0.43 to 0.22)  |              |       |
| <b>NAAA</b>       |                        |                        |                        |              |       |
| Raw score         | 3.74 (3.6 to 3.88)     | 3.66 (3.51 to 3.8)     | 0.09 (-0.11 to 0.28)   | 0.400        | 0.891 |
| z-score           | 0.02 (-0.21 to 0.25)   | -0.12 (-0.36 to 0.12)  | 0.14 (-0.19 to 0.47)   |              |       |
| <b>NBL1</b>       |                        |                        |                        |              |       |
| Raw score         | 5.59 (5.57 to 5.62)    | 5.61 (5.58 to 5.64)    | -0.01 (-0.05 to 0.03)  | 0.459        | 0.891 |
| z-score           | -0.18 (-0.44 to 0.08)  | -0.04 (-0.3 to 0.23)   | -0.14 (-0.52 to 0.24)  |              |       |
| <b>NCAN</b>       |                        |                        |                        |              |       |
| Raw score         | 9.8 (9.76 to 9.84)     | 9.77 (9.74 to 9.81)    | 0.03 (-0.03 to 0.08)   | 0.359        | 0.884 |
| z-score           | -0.21 (-0.38 to -0.04) | -0.33 (-0.5 to -0.15)  | 0.11 (-0.13 to 0.36)   |              |       |
| <b>NCDase</b>     |                        |                        |                        |              |       |
| Raw score         | 4.17 (4.1 to 4.24)     | 4.14 (4.07 to 4.21)    | 0.03 (-0.06 to 0.13)   | 0.502        | 0.891 |
| z-score           | -0.03 (-0.17 to 0.11)  | -0.1 (-0.25 to 0.05)   | 0.07 (-0.14 to 0.28)   |              |       |
| <b>NEP</b>        |                        |                        |                        |              |       |
| Raw score         | 3.07 (3.01 to 3.13)    | 3.05 (2.99 to 3.11)    | 0.02 (-0.06 to 0.1)    | 0.648        | 0.891 |
| z-score           | -0.04 (-0.14 to 0.05)  | -0.07 (-0.17 to 0.03)  | 0.03 (-0.11 to 0.17)   |              |       |
| <b>NMNAT1</b>     |                        |                        |                        |              |       |
| Raw score         | 4.82 (4.51 to 5.14)    | 4.6 (4.27 to 4.93)     | 0.22 (-0.23 to 0.68)   | 0.334        | 0.884 |
| z-score           | 0.47 (0.19 to 0.75)    | 0.27 (-0.02 to 0.56)   | 0.2 (-0.21 to 0.6)     |              |       |
| <b>NrCAM</b>      |                        |                        |                        |              |       |
| Raw score         | 10.12 (10.09 to 10.15) | 10.1 (10.07 to 10.13)  | 0.02 (-0.02 to 0.06)   | 0.354        | 0.884 |
| z-score           | -0.25 (-0.53 to 0.02)  | -0.44 (-0.72 to -0.16) | 0.18 (-0.21 to 0.58)   |              |       |
| <b>NRP2</b>       |                        |                        |                        |              |       |
| Raw score         | 8.95 (8.93 to 8.97)    | 8.94 (8.92 to 8.97)    | 0.01 (-0.03 to 0.04)   | 0.663        | 0.891 |
| z-score           | -0.25 (-0.49 to -0.01) | -0.33 (-0.58 to -0.08) | 0.08 (-0.27 to 0.42)   |              |       |
| <b>NTRK2</b>      |                        |                        |                        |              |       |
| Raw score         | 7.11 (7.06 to 7.15)    | 7.12 (7.07 to 7.16)    | -0.01 (-0.07 to 0.05)  | 0.759        | 0.962 |
| z-score           | -0.37 (-0.66 to -0.09) | -0.31 (-0.6 to -0.01)  | -0.06 (-0.48 to 0.35)  |              |       |
| <b>NTRK3</b>      |                        |                        |                        |              |       |
| Raw score         | 7.45 (7.4 to 7.51)     | 7.47 (7.42 to 7.53)    | -0.02 (-0.09 to 0.06)  | 0.666        | 0.891 |
| z-score           | -0.3 (-0.54 to -0.05)  | -0.22 (-0.48 to 0.04)  | -0.08 (-0.44 to 0.28)  |              |       |
| <b>PDGFRalpha</b> |                        |                        |                        |              |       |
| Raw score         | 5.84 (5.78 to 5.9)     | 5.85 (5.79 to 5.92)    | -0.01 (-0.1 to 0.08)   | 0.853        | 0.967 |
| z-score           | -0.01 (-0.25 to 0.23)  | 0.03 (-0.22 to 0.27)   | -0.03 (-0.38 to 0.31)  |              |       |

Exercise and neurology biomarkers in childhood

**Table S3A.** (Continued)

|               |                        |                        |                        |              |       |
|---------------|------------------------|------------------------|------------------------|--------------|-------|
| PLXNB1        |                        |                        |                        |              |       |
| Raw score     | 1.91 (1.85 to 1.96)    | 1.89 (1.83 to 1.94)    | 0.02 (-0.05 to 0.1)    |              |       |
| z-score       | -0.19 (-0.4 to 0.02)   | -0.28 (-0.49 to -0.06) | 0.09 (-0.22 to 0.38)   | 0.577        | 0.891 |
| <b>PLXNB3</b> |                        |                        |                        |              |       |
| Raw score     | 4.18 (4.09 to 4.27)    | 4.33 (4.24 to 4.43)    | -0.15 (-0.28 to -0.02) | <b>0.028</b> | 0.517 |
| z-score       | -0.36 (-0.48 to -0.23) | -0.16 (-0.28 to -0.03) | -0.2 (-0.37 to -0.02)  |              |       |
| PRTG          |                        |                        |                        |              |       |
| Raw score     | 7.19 (7.12 to 7.27)    | 7.14 (7.06 to 7.22)    | 0.05 (-0.06 to 0.16)   | 0.349        | 0.884 |
| z-score       | -0.03 (-0.26 to 0.2)   | -0.19 (-0.43 to 0.05)  | 0.16 (-0.18 to 0.49)   |              |       |
| PVR           |                        |                        |                        |              |       |
| Raw score     | 8.83 (8.78 to 8.88)    | 8.85 (8.8 to 8.89)     | -0.02 (-0.09 to 0.05)  | 0.599        | 0.891 |
| z-score       | -0.15 (-0.32 to 0.02)  | -0.08 (-0.26 to 0.1)   | -0.06 (-0.31 to 0.18)  |              |       |
| RGMA          |                        |                        |                        |              |       |
| Raw score     | 11.04 (10.99 to 11.1)  | 11.05 (11 to 11.11)    | -0.01 (-0.09 to 0.07)  | 0.782        | 0.968 |
| z-score       | -0.17 (-0.41 to 0.08)  | -0.12 (-0.37 to 0.14)  | -0.05 (-0.41 to 0.31)  |              |       |
| RGMB          |                        |                        |                        |              |       |
| Raw score     | 6.27 (6.2 to 6.34)     | 6.3 (6.23 to 6.38)     | -0.03 (-0.13 to 0.07)  | 0.525        | 0.891 |
| z-score       | -0.07 (-0.35 to 0.2)   | 0.05 (-0.23 to 0.34)   | -0.13 (-0.53 to 0.27)  |              |       |
| ROBO2         |                        |                        |                        |              |       |
| Raw score     | 6.97 (6.91 to 7.04)    | 7.02 (6.96 to 7.09)    | -0.05 (-0.14 to 0.04)  | 0.290        | 0.884 |
| z-score       | -0.3 (-0.53 to -0.07)  | -0.12 (-0.36 to 0.11)  | -0.18 (-0.5 to 0.15)   |              |       |
| RSPO1         |                        |                        |                        |              |       |
| Raw score     | 1.91 (1.85 to 1.98)    | 1.97 (1.9 to 2.04)     | -0.05 (-0.15 to 0.04)  | 0.277        | 0.884 |
| z-score       | -0.24 (-0.46 to -0.02) | -0.06 (-0.3 to 0.17)   | -0.18 (-0.5 to 0.14)   |              |       |
| SCARA5        |                        |                        |                        |              |       |
| Raw score     | 9.26 (9.21 to 9.32)    | 9.3 (9.24 to 9.35)     | -0.03 (-0.11 to 0.05)  | 0.441        | 0.891 |
| z-score       | -0.09 (-0.36 to 0.19)  | 0.07 (-0.22 to 0.36)   | -0.16 (-0.56 to 0.24)  |              |       |
| <b>SCARB2</b> |                        |                        |                        |              |       |
| Raw score     | 4.12 (4.06 to 4.18)    | 4.24 (4.18 to 4.3)     | -0.13 (-0.21 to -0.04) | <b>0.004</b> | 0.163 |
| z-score       | -0.08 (-0.29 to 0.13)  | 0.38 (0.16 to 0.6)     | -0.46 (-0.77 to -0.16) |              |       |
| SCARF2        |                        |                        |                        |              |       |
| Raw score     | 7.13 (7.07 to 7.2)     | 7.1 (7.04 to 7.17)     | 0.03 (-0.07 to 0.12)   | 0.545        | 0.891 |
| z-score       | -0.1 (-0.36 to 0.16)   | -0.22 (-0.49 to 0.06)  | 0.12 (-0.26 to 0.5)    |              |       |
| sFRP3         |                        |                        |                        |              |       |
| Raw score     | 3.2 (3.04 to 3.35)     | 3.32 (3.15 to 3.48)    | -0.12 (-0.34 to 0.1)   | 0.295        | 0.884 |
| z-score       | -0.28 (-0.47 to -0.09) | -0.13 (-0.33 to 0.06)  | -0.14 (-0.42 to 0.13)  |              |       |
| SIGLEC1       |                        |                        |                        |              |       |
| Raw score     | 6.55 (6.46 to 6.64)    | 6.64 (6.54 to 6.73)    | -0.08 (-0.22 to 0.05)  | 0.216        | 0.884 |
| z-score       | 0 (-0.19 to 0.19)      | 0.17 (-0.03 to 0.37)   | -0.17 (-0.45 to 0.1)   |              |       |
| Siglec9       |                        |                        |                        |              |       |
| Raw score     | 5.07 (5.03 to 5.11)    | 5.08 (5.03 to 5.12)    | -0.01 (-0.07 to 0.05)  | 0.768        | 0.962 |
| z-score       | -0.12 (-0.26 to 0.03)  | -0.09 (-0.23 to 0.06)  | -0.03 (-0.23 to 0.17)  |              |       |
| SKR3          |                        |                        |                        |              |       |
| Raw score     | 6.47 (6.42 to 6.52)    | 6.5 (6.46 to 6.55)     | -0.04 (-0.1 to 0.03)   | 0.286        | 0.884 |
| z-score       | -0.12 (-0.3 to 0.05)   | 0.01 (-0.17 to 0.2)    | -0.14 (-0.4 to 0.12)   |              |       |
| SMOC2         |                        |                        |                        |              |       |
| Raw score     | 8.89 (8.82 to 8.96)    | 8.92 (8.85 to 9)       | -0.03 (-0.14 to 0.07)  | 0.544        | 0.891 |
| z-score       | -0.01 (-0.23 to 0.21)  | 0.09 (-0.14 to 0.32)   | -0.1 (-0.42 to 0.22)   |              |       |
| SMPD1         |                        |                        |                        |              |       |
| Raw score     | 4.64 (4.57 to 4.72)    | 4.61 (4.53 to 4.68)    | 0.04 (-0.07 to 0.15)   | 0.481        | 0.891 |
| z-score       | 0.15 (-0.08 to 0.37)   | 0.03 (-0.2 to 0.27)    | 0.12 (-0.21 to 0.44)   |              |       |
| SPOCK1        |                        |                        |                        |              |       |
| Raw score     | 2.82 (2.77 to 2.86)    | 2.87 (2.82 to 2.91)    | -0.05 (-0.12 to 0.01)  | 0.099        | 0.884 |
| z-score       | -0.17 (-0.36 to 0.03)  | 0.07 (-0.13 to 0.27)   | -0.24 (-0.52 to 0.05)  |              |       |
| THY1          |                        |                        |                        |              |       |
| Raw score     | 10.59 (10.55 to 10.64) | 10.58 (10.54 to 10.63) | 0.01 (-0.05 to 0.07)   | 0.751        | 0.962 |
| z-score       | 0.19 (-0.1 to 0.47)    | 0.12 (-0.17 to 0.42)   | 0.06 (-0.34 to 0.47)   |              |       |
| TMPRSS5       |                        |                        |                        |              |       |
| Raw score     | 3.3 (3.24 to 3.35)     | 3.24 (3.19 to 3.3)     | 0.05 (-0.03 to 0.13)   | 0.191        | 0.884 |
| z-score       | -0.07 (-0.27 to 0.12)  | -0.26 (-0.47 to -0.06) | 0.19 (-0.1 to 0.48)    |              |       |
| TNFRSF12A     |                        |                        |                        |              |       |
| Raw score     | 5.27 (5.19 to 5.36)    | 5.27 (5.18 to 5.36)    | 0 (-0.12 to 0.13)      | 0.974        | 0.995 |
| z-score       | -0.14 (-0.42 to 0.14)  | -0.15 (-0.44 to 0.14)  | 0.01 (-0.41 to 0.42)   |              |       |
| TNFRSF21      |                        |                        |                        |              |       |
| Raw score     | 8.57 (8.53 to 8.61)    | 8.57 (8.54 to 8.61)    | 0 (-0.06 to 0.05)      | 0.914        | 0.990 |
| z-score       | -0.21 (-0.42 to 0)     | -0.19 (-0.41 to 0.03)  | -0.02 (-0.32 to 0.29)  |              |       |



## Exercise and neurology biomarkers in childhood

**Table S3A.** (Continued)

|           |                        |                      |                       |       |       |
|-----------|------------------------|----------------------|-----------------------|-------|-------|
| TNR       |                        |                      |                       |       |       |
| Raw score | 4.95 (4.87 to 5.02)    | 4.99 (4.91 to 5.06)  | -0.04 (-0.15 to 0.07) | 0.457 | 0.891 |
| z-score   | -0.06 (-0.25 to 0.14)  | 0.05 (-0.16 to 0.25) | -0.11 (-0.39 to 0.18) |       |       |
| UNC5C     |                        |                      |                       |       |       |
| Raw score | 5.04 (4.98 to 5.09)    | 5.07 (5.01 to 5.13)  | -0.04 (-0.12 to 0.04) | 0.357 | 0.884 |
| z-score   | -0.18 (-0.35 to -0.02) | -0.07 (-0.24 to 0.1) | -0.11 (-0.35 to 0.13) |       |       |
| VWC2      |                        |                      |                       |       |       |
| Raw score | 6.24 (6.16 to 6.33)    | 6.32 (6.23 to 6.4)   | -0.07 (-0.19 to 0.05) | 0.229 | 0.884 |
| z-score   | -0.09 (-0.31 to 0.13)  | 0.1 (-0.13 to 0.33)  | -0.19 (-0.51 to 0.12) |       |       |
| WFIKKN1   |                        |                      |                       |       |       |
| Raw score | 3.71 (3.65 to 3.76)    | 3.78 (3.72 to 3.83)  | -0.07 (-0.15 to 0.01) | 0.099 | 0.884 |
| z-score   | -0.09 (-0.25 to 0.08)  | 0.11 (-0.06 to 0.28) | -0.2 (-0.43 to 0.04)  |       |       |

z Score values indicate how many standard deviations have the post-intervention values changed with respect to the baseline mean and standard deviation. E.g., a 0.50 z Score means that the mean value at post-intervention is 0.50 standard deviations higher than the mean value at baseline, indicating a positive change, with negative values indicating the opposite. Values are expressed as mean (95% CI). Analyses were adjusted for baseline values. N=81 participants. Raw scores values are expressed in Normalized Protein eXpression (NPX) units. This means that a high NPX value equals a high protein concentration. Because NPX is in a log<sub>2</sub> scale, a 1 NPX difference means a doubling of protein concentration. If needed NPX values can be converted into linear scale: 2NPX= linear NPX. Abbreviations:  $p_{FDR}$ = adjusted for multiple comparisons using false discovery rate.

## Exercise and neurology biomarkers in childhood

**Table S4A.** ELISA assay technique validation

|                           | N <sub>all</sub> | N <sub>I</sub> | Intervention group         | N <sub>c</sub> | Control group              | Differences between groups | <i>p</i>     |
|---------------------------|------------------|----------------|----------------------------|----------------|----------------------------|----------------------------|--------------|
| <b>Intention-to-treat</b> |                  |                |                            |                |                            |                            |              |
| MSR1 (pg/ml)              |                  |                |                            |                |                            |                            |              |
| Raw score                 | 83               | 45             | 249.36 (223.72, 275.00)    | 38             | 293.88 (265.98, 321.78)    | -44.52 (-82.42, -6.63)     | <b>0.022</b> |
| z-score                   |                  |                | -0.14 (-0.30, 0.03)        |                | 0.15 (-0.03, 0.33)         | -0.29 (-0.53, -0.04)       |              |
| PLXNB3 (pg/ml)            |                  |                |                            |                |                            |                            |              |
| Raw score                 | 81               | 45             | 2073.95 (1715.68, 2432.22) | 36             | 2152.41 (1751.42, 2553.39) | -78.46 (-618.71, 461.79)   | 0.773        |
| z-score                   |                  |                | -0.01 (-0.07, 0.06)        |                | 0.01 (-0.06, 0.08)         | -0.01 (-0.11, 0.08)        |              |
| KYNU (ng/ml)              |                  |                |                            |                |                            |                            |              |
| Raw score                 | 87               | 48             | 74.98 (32.52, 117.45)      | 39             | 94.27 (47.13, 141.41)      | -19.29 (-82.90, 44.33)     | 0.548        |
| z-score                   |                  |                | 0.06 (-0.22, 0.34)         |                | 0.18 (-0.13, 0.50)         | -0.13 (-0.55, 0.29)        |              |

z Score values indicate how many standard deviations have the post-intervention values changed with respect to the baseline mean and standard deviation. E.g., a 0.50 z Score means that the mean value at post-intervention is 0.50 standard deviations higher than the mean value at baseline, indicating a positive change, with negative values indicating the opposite. Values are expressed as mean (95% CI). Analyses were adjusted for baseline values.

## Exercise and neurology biomarkers in childhood

**Table S5A.** Intention-to-treat effects of the ActiveBrains intervention on raw and z Score post-intervention novel blood-circulating biomarkers identified based on previous literature.

|                    | N <sub>all</sub> | N <sub>I</sub> | Intervention group         | N <sub>c</sub> | Mean (95% CI)              |                            | <i>p</i> |
|--------------------|------------------|----------------|----------------------------|----------------|----------------------------|----------------------------|----------|
|                    |                  |                |                            |                | Control group              | Differences between groups |          |
| BDNF (ng/ml)       |                  |                |                            |                |                            |                            |          |
| Raw score          | 85               | 47             | 3.84 (2.97, 4.71)          | 38             | 2.91 (1.95, 3.88)          | 0.92 (-0.38, 2.23)         | 0.162    |
| z-score            |                  |                | -0.16 (-0.36, 0.03)        |                | -0.37 (-0.59, -0.15)       | 0.21 (-0.09, 0.50)         |          |
| BHB (ng/μl)        |                  |                |                            |                |                            |                            |          |
| Raw score          | 86               | 47             | 31.61 (28.23, 34.99)       | 39             | 32.33 (28.62, 36.05)       | -0.72 (-5.76, 4.32)        | 0.777    |
| z-score            |                  |                | -0.30 (-0.68, 0.08)        |                | -0.22 (-0.64, 0.20)        | -0.08 (-0.65, 0.48)        |          |
| CTSB (μg/l)        |                  |                |                            |                |                            |                            |          |
| Raw score          | 86               | 47             | 56.01 (51.16, 60.86)       | 39             | 59.15 (53.82, 64.48)       | -3.14 (-10.41, 4.14)       | 0.393    |
| z-score            |                  |                | -0.08 (-0.31, 0.15)        |                | 0.07 (-0.18, 0.33)         | -0.15 (-0.50, 0.20)        |          |
| Kynurenine (ng/ml) |                  |                |                            |                |                            |                            |          |
| Raw score          | 87               | 48             | 1134.93 (1055.48, 1214.37) | 39             | 1079.54 (991.40, 1167.67)  | -55.39 (-174.05, 63.28)    | 0.356    |
| z-score            |                  |                | 0.32 (0.13, 0.51)          |                | 0.19 (-0.02, 0.40)         | 0.13 (-0.15, 0.41)         |          |
| FGF21 (pg/ml)      |                  |                |                            |                |                            |                            |          |
| Raw score          | 84               | 45             | 79.62 (60.37, 98.87)       | 39             | 103.92 (83.24, 124.61)     | -24.30 (-52.59, 3.98)      | 0.091    |
| z-score            |                  |                | -0.10 (-0.27, 0.08)        |                | 0.12 (-0.06, 0.31)         | -0.22 (-0.47, 0.03)        |          |
| sVCAM-1 (μg/l)     |                  |                |                            |                |                            |                            |          |
| Raw score          | 86               | 47             | 1268.18 (1200.73, 1335.63) | 39             | 1307.57 (1233.52, 1381.62) | -39.39 (-139.58, 60.80)    | 0.436    |
| z-score            |                  |                | 0.06 (-0.18, 0.31)         |                | 0.21 (-0.06, 0.48)         | -0.14 (-0.51, 0.22)        |          |

z Score values indicate how many standard deviations have the post-intervention values changed with respect to the baseline mean and standard deviation. E.g., a 0.50 z Score means that the mean value at post-intervention is 0.50 standard deviations higher than the mean value at baseline, indicating a positive change, with negative values indicating the opposite. Values are expressed as mean (95% CI). Analyses were adjusted for baseline values. Abbreviations: BHB= B-hydroxybutyrate, CTSB= Cathepsin B, FGF21= Fibroblast growth factor 21, sVCAM-1= vascular cell adhesion molecule-1.

Exercise and neurology biomarkers in childhood

**Table S6A.** Intention-to-treat effects of the ActiveBrains intervention on raw and z Score post-intervention neurology-related proteins (n=87).

|            | Intervention group     | Control group          | Differences between groups | <i>p</i> | <i>p</i> <sub>FDR</sub> |
|------------|------------------------|------------------------|----------------------------|----------|-------------------------|
| ADAM22     |                        |                        |                            |          |                         |
| Raw score  | 5.00 (4.92 to 5.07)    | 4.97 (4.89 to 5.06)    | 0.02 (-0.09 to 0.13)       | 0.685    |                         |
| z-score    | 0.14 (-0.10 to 0.38)   | 0.06 (-0.20 to 0.33)   | 0.07 (-0.28 to 0.43)       |          | 0.998                   |
| ADAM23     |                        |                        |                            |          |                         |
| Raw score  | 4.97 (4.90 to 5.04)    | 4.91 (4.83 to 4.99)    | 0.06 (-0.05 to 0.16)       | 0.276    |                         |
| z-score    | -0.01 (-0.22 to 0.20)  | -0.19 (-0.42 to 0.05)  | 0.17 (-0.14 to 0.49)       |          | 0.935                   |
| Alpha2MRAP |                        |                        |                            |          |                         |
| Raw score  | 8.02 (7.86 to 8.18)    | 8.03 (7.85 to 8.21)    | 0.00 (-0.24 to 0.23)       | 0.970    |                         |
| z-score    | -0.17 (-0.34 to 0.00)  | -0.16 (-0.35 to 0.03)  | 0.00 (-0.26 to 0.25)       |          | 0.998                   |
| BCAN       |                        |                        |                            |          |                         |
| Raw score  | 5.05 (4.99 to 5.11)    | 5.09 (5.02 to 5.15)    | -0.04 (-0.13 to 0.05)      | 0.396    |                         |
| z-score    | -0.3 (-0.5 to -0.11)   | -0.18 (-0.39 to 0.03)  | -0.12 (-0.41 to 0.16)      |          | 0.935                   |
| BetaNGF    |                        |                        |                            |          |                         |
| Raw score  | 1.28 (1.24 to 1.32)    | 1.29 (1.25 to 1.33)    | -0.01 (-0.06 to 0.05)      | 0.799    |                         |
| z-score    | -0.19 (-0.37 to -0.02) | -0.16 (-0.35 to 0.03)  | -0.03 (-0.29 to 0.22)      |          | 0.998                   |
| BMP4       |                        |                        |                            |          |                         |
| Raw score  | 4.46 (4.39 to 4.53)    | 4.45 (4.37 to 4.53)    | 0.01 (-0.10 to 0.12)       | 0.880    |                         |
| z-score    | 0.05 (-0.20 to 0.30)   | 0.02 (-0.25 to 0.29)   | 0.03 (-0.34 to 0.40)       |          | 0.998                   |
| CADM3      |                        |                        |                            |          |                         |
| Raw score  | 4.83 (4.75 to 4.91)    | 4.82 (4.74 to 4.91)    | 0.01 (-0.11 to 0.12)       | 0.920    |                         |
| z-score    | -0.12 (-0.29 to 0.06)  | -0.13 (-0.32 to 0.06)  | 0.01 (-0.25 to 0.27)       |          | 0.998                   |
| CD200      |                        |                        |                            |          |                         |
| Raw score  | 7.05 (6.99 to 7.11)    | 7.05 (6.98 to 7.11)    | 0.00 (-0.08 to 0.09)       | 0.903    |                         |
| z-score    | -0.07 (-0.29 to 0.16)  | -0.09 (-0.34 to 0.16)  | 0.02 (-0.31 to 0.36)       |          | 0.998                   |
| CD200R1    |                        |                        |                            |          |                         |
| Raw score  | 5.15 (5.10 to 5.20)    | 5.16 (5.11 to 5.22)    | -0.01 (-0.09 to 0.06)      | 0.674    |                         |
| z-score    | -0.11 (-0.27 to 0.05)  | -0.06 (-0.23 to 0.12)  | -0.05 (-0.29 to 0.19)      |          | 0.998                   |
| CD38       |                        |                        |                            |          |                         |
| Raw score  | 5.96 (5.89 to 6.02)    | 5.99 (5.92 to 6.06)    | -0.04 (-0.13 to 0.06)      | 0.425    |                         |
| z-score    | -0.24 (-0.52 to 0.03)  | -0.08 (-0.38 to 0.23)  | -0.17 (-0.58 to 0.24)      |          | 0.935                   |
| CDH3       |                        |                        |                            |          |                         |
| Raw score  | 8.07 (8.00 to 8.14)    | 8.12 (8.04 to 8.19)    | -0.05 (-0.15 to 0.05)      | 0.342    |                         |
| z-score    | -0.06 (-0.28 to 0.15)  | 0.09 (-0.15 to 0.33)   | -0.16 (-0.48 to 0.17)      |          | 0.935                   |
| CDH6       |                        |                        |                            |          |                         |
| Raw score  | 5.39 (5.35 to 5.44)    | 5.38 (5.33 to 5.43)    | 0.01 (-0.06 to 0.08)       | 0.781    |                         |
| z-score    | -0.1 (-0.35 to 0.15)   | -0.15 (-0.43 to 0.12)  | 0.05 (-0.32 to 0.43)       |          | 0.998                   |
| CLEC10A    |                        |                        |                            |          |                         |
| Raw score  | 5.62 (5.54 to 5.7)     | 5.69 (5.6 to 5.78)     | -0.07 (-0.2 to 0.05)       | 0.231    |                         |
| z-score    | -0.12 (-0.33 to 0.09)  | 0.07 (-0.16 to 0.30)   | -0.19 (-0.5 to 0.12)       |          | 0.935                   |
| CLEC1B     |                        |                        |                            |          |                         |
| Raw score  | 9.93 (9.67 to 10.19)   | 9.9 (9.62 to 10.19)    | 0.03 (-0.36 to 0.42)       | 0.892    |                         |
| z-score    | -0.2 (-0.43 to 0.02)   | -0.23 (-0.48 to 0.02)  | 0.02 (-0.32 to 0.36)       |          | 0.998                   |
| CLM1       |                        |                        |                            |          |                         |
| Raw score  | 6.31 (6.23 to 6.39)    | 6.31 (6.22 to 6.4)     | 0.00 (-0.12 to 0.12)       | 0.998    |                         |
| z-score    | -0.03 (-0.16 to 0.11)  | -0.03 (-0.18 to 0.13)  | 0.00 (-0.21 to 0.21)       |          | 0.998                   |
| CLM6       |                        |                        |                            |          |                         |
| Raw score  | 5.8 (5.76 to 5.84)     | 5.83 (5.78 to 5.87)    | -0.03 (-0.08 to 0.03)      | 0.380    |                         |
| z-score    | -0.13 (-0.28 to 0.03)  | -0.03 (-0.20 to 0.14)  | -0.10 (-0.33 to 0.13)      |          | 0.935                   |
| CNTN5      |                        |                        |                            |          |                         |
| Raw score  | 6.19 (6.12 to 6.27)    | 6.16 (6.07 to 6.24)    | 0.04 (-0.08 to 0.15)       | 0.552    |                         |
| z-score    | -0.23 (-0.44 to -0.03) | -0.32 (-0.55 to -0.10) | 0.09 (-0.21 to 0.4)        |          | 0.992                   |
| CPA2       |                        |                        |                            |          |                         |
| Raw score  | 9.93 (9.81 to 10.05)   | 10.10 (9.97 to 10.23)  | -0.17 (-0.35 to 0.01)      | 0.067    |                         |
| z-score    | -0.06 (-0.25 to 0.12)  | 0.20 (0.00 to 0.41)    | -0.26 (-0.55 to 0.02)      |          | 0.914                   |
| CPM        |                        |                        |                            |          |                         |
| Raw score  | 7.08 (7.04 to 7.12)    | 7.05 (7.00 to 7.10)    | 0.03 (-0.04 to 0.09)       | 0.379    |                         |
| z-score    | 0.07 (-0.11 to 0.25)   | -0.05 (-0.25 to 0.15)  | 0.12 (-0.15 to 0.39)       |          | 0.935                   |
| CRTAM      |                        |                        |                            |          |                         |
| Raw score  | 5.95 (5.88 to 6.02)    | 5.95 (5.88 to 6.03)    | 0.00 (-0.11 to 0.10)       | 0.928    |                         |
| z-score    | -0.16 (-0.29 to -0.03) | -0.15 (-0.29 to -0.01) | -0.01 (-0.20 to 0.18)      |          | 0.998                   |
| CTSC       |                        |                        |                            |          |                         |
| Raw score  | 2.98 (2.89 to 3.07)    | 2.86 (2.76 to 2.96)    | 0.12 (-0.02 to 0.25)       | 0.098    |                         |
| z-score    | 0.04 (-0.15 to 0.22)   | -0.20 (-0.40 to 0.01)  | 0.23 (-0.04 to 0.51)       |          | 0.935                   |

Exercise and neurology biomarkers in childhood

**Table S6A.** (Continued)

|              |                        |                        |                       |       |       |
|--------------|------------------------|------------------------|-----------------------|-------|-------|
| CTSS         |                        |                        |                       |       |       |
| Raw score    | 5.67 (5.63 to 5.72)    | 5.61 (5.56 to 5.66)    | 0.06 (0.00 to 0.13)   | 0.070 | 0.914 |
| z-score      | 0.23 (0.00 to 0.46)    | -0.09 (-0.35 to 0.16)  | 0.32 (-0.03 to 0.66)  |       |       |
| DDR1         |                        |                        |                       |       |       |
| Raw score    | 7.74 (7.7 to 7.78)     | 7.75 (7.70 to 7.79)    | 0.00 (-0.07 to 0.06)  | 0.876 | 0.998 |
| z-score      | -0.16 (-0.39 to 0.07)  | -0.13 (-0.38 to 0.12)  | -0.03 (-0.37 to 0.31) |       |       |
| Dkk4         |                        |                        |                       |       |       |
| Raw score    | 2.38 (2.27 to 2.49)    | 2.50 (2.38 to 2.63)    | -0.13 (-0.3 to 0.04)  | 0.147 | 0.935 |
| z-score      | -0.08 (-0.4 to 0.24)   | 0.28 (-0.08 to 0.64)   | -0.36 (-0.84 to 0.13) |       |       |
| DRAXIN       |                        |                        |                       |       |       |
| Raw score    | 4.24 (4.15 to 4.33)    | 4.24 (4.14 to 4.34)    | 0 (-0.13 to 0.13)     | 0.993 | 0.998 |
| z-score      | -0.08 (-0.26 to 0.10)  | -0.08 (-0.28 to 0.12)  | 0 (-0.28 to 0.27)     |       |       |
| EDA2R        |                        |                        |                       |       |       |
| Raw score    | 3.75 (3.68 to 3.82)    | 3.77 (3.69 to 3.85)    | -0.01 (-0.12 to 0.09) | 0.774 | 0.998 |
| z-score      | 0.22 (0.01 to 0.43)    | 0.26 (0.03 to 0.50)    | -0.04 (-0.36 to 0.27) |       |       |
| EFNA4        |                        |                        |                       |       |       |
| Raw score    | 3.53 (3.48 to 3.58)    | 3.57 (3.51 to 3.62)    | -0.03 (-0.11 to 0.04) | 0.368 | 0.935 |
| z-score      | -0.06 (-0.31 to 0.19)  | 0.11 (-0.16 to 0.38)   | -0.17 (-0.54 to 0.20) |       |       |
| EPHB6        |                        |                        |                       |       |       |
| Raw score    | 4.93 (4.88 to 4.98)    | 4.92 (4.87 to 4.98)    | 0.00 (-0.08 to 0.08)  | 0.937 | 0.998 |
| z-score      | -0.21 (-0.40 to -0.01) | -0.22 (-0.43 to 0.00)  | 0.01 (-0.28 to 0.30)  |       |       |
| EZR          |                        |                        |                       |       |       |
| Raw score    | 5.14 (5.08 to 5.21)    | 5.16 (5.09 to 5.23)    | -0.01 (-0.11 to 0.09) | 0.773 | 0.998 |
| z-score      | 0.14 (-0.10 to 0.38)   | 0.2 (-0.07 to 0.46)    | -0.05 (-0.42 to 0.31) |       |       |
| FcRL2        |                        |                        |                       |       |       |
| Raw score    | 5.37 (5.31 to 5.43)    | 5.43 (5.37 to 5.5)     | -0.07 (-0.16 to 0.02) | 0.132 | 0.935 |
| z-score      | -0.19 (-0.33 to -0.04) | -0.02 (-0.18 to 0.14)  | -0.17 (-0.39 to 0.05) |       |       |
| FLRT2        |                        |                        |                       |       |       |
| Raw score    | 3.24 (3.17 to 3.3)     | 3.25 (3.18 to 3.32)    | -0.01 (-0.11 to 0.08) | 0.763 | 0.998 |
| z-score      | -0.05 (-0.39 to 0.3)   | 0.03 (-0.35 to 0.41)   | -0.08 (-0.59 to 0.44) |       |       |
| gal8         |                        |                        |                       |       |       |
| Raw score    | 5.75 (5.64 to 5.87)    | 5.74 (5.61 to 5.86)    | 0.01 (-0.16 to 0.19)  | 0.859 | 0.998 |
| z-score      | -0.22 (-0.35 to -0.10) | -0.24 (-0.38 to -0.10) | 0.02 (-0.17 to 0.20)  |       |       |
| GCP5         |                        |                        |                       |       |       |
| Raw score    | 5.35 (5.22 to 5.49)    | 5.25 (5.10 to 5.40)    | 0.11 (-0.10 to 0.31)  | 0.302 | 0.935 |
| z-score      | -0.15 (-0.36 to 0.06)  | -0.31 (-0.55 to -0.08) | 0.16 (-0.15 to 0.48)  |       |       |
| GCSF         |                        |                        |                       |       |       |
| Raw score    | 3.62 (3.48 to 3.76)    | 3.72 (3.56 to 3.88)    | -0.10 (-0.31 to 0.11) | 0.359 | 0.935 |
| z-score      | -0.23 (-0.47 to 0.01)  | -0.06 (-0.33 to 0.20)  | -0.16 (-0.52 to 0.19) |       |       |
| GDF8         |                        |                        |                       |       |       |
| Raw score    | 4.27 (4.18 to 4.37)    | 4.22 (4.11 to 4.32)    | 0.05 (-0.09 to 0.20)  | 0.455 | 0.935 |
| z-score      | 0.14 (-0.11 to 0.40)   | 0 (-0.28 to 0.28)      | 0.14 (-0.23 to 0.52)  |       |       |
| GDNF         |                        |                        |                       |       |       |
| Raw score    | 1.38 (1.30 to 1.46)    | 1.36 (1.27 to 1.45)    | 0.02 (-0.11 to 0.14)  | 0.776 | 0.998 |
| z-score      | 0.10 (-0.24 to 0.45)   | 0.03 (-0.35 to 0.41)   | 0.07 (-0.44 to 0.58)  |       |       |
| GDNFRalpha 3 |                        |                        |                       |       |       |
| Raw score    | 5.55 (5.49 to 5.60)    | 5.54 (5.47 to 5.60)    | 0.01 (-0.07 to 0.10)  | 0.757 | 0.998 |
| z-score      | -0.03 (-0.24 to 0.18)  | -0.08 (-0.32 to 0.15)  | 0.05 (-0.27 to 0.37)  |       |       |
| GFRalpha 1   |                        |                        |                       |       |       |
| Raw score    | 7.56 (7.51 to 7.62)    | 7.56 (7.49 to 7.62)    | 0.01 (-0.07 to 0.09)  | 0.843 | 0.998 |
| z-score      | -0.06 (-0.29 to 0.16)  | -0.10 (-0.35 to 0.15)  | 0.03 (-0.30 to 0.37)  |       |       |
| GMCSFRalpha  |                        |                        |                       |       |       |
| Raw score    | 6.10 (6.04 to 6.16)    | 6.14 (6.07 to 6.20)    | -0.03 (-0.12 to 0.06) | 0.462 | 0.935 |
| z-score      | -0.10 (-0.18 to -0.01) | -0.05 (-0.14 to 0.04)  | -0.05 (-0.17 to 0.08) |       |       |
| GZMA         |                        |                        |                       |       |       |
| Raw score    | 6.38 (6.27 to 6.49)    | 6.45 (6.33 to 6.58)    | -0.07 (-0.24 to 0.09) | 0.384 | 0.935 |
| z-score      | -0.07 (-0.28 to 0.13)  | 0.06 (-0.17 to 0.28)   | -0.13 (-0.44 to 0.17) |       |       |
| HAGH         |                        |                        |                       |       |       |
| Raw score    | 6.28 (5.98 to 6.58)    | 6.14 (5.81 to 6.48)    | 0.14 (-0.32 to 0.59)  | 0.556 | 0.992 |
| z-score      | 1.1 (0.64 to 1.55)     | 0.89 (0.38 to 1.40)    | 0.2 (-0.48 to 0.89)   |       |       |
| IL12         |                        |                        |                       |       |       |
| Raw score    | 9.08 (8.99 to 9.17)    | 9.14 (9.03 to 9.24)    | -0.06 (-0.19 to 0.08) | 0.422 | 0.935 |
| z-score      | -0.02 (-0.20 to 0.16)  | 0.09 (-0.11 to 0.28)   | -0.11 (-0.37 to 0.16) |       |       |

Exercise and neurology biomarkers in childhood

**Table S6A.** (Continued)

|                  |                        |                        |                        |              |       |
|------------------|------------------------|------------------------|------------------------|--------------|-------|
| <b>IL5Ralpha</b> |                        |                        |                        |              |       |
| Raw score        | 3.31 (3.22 to 3.39)    | 3.35 (3.26 to 3.44)    | -0.05 (-0.17 to 0.08)  | 0.452        | 0.935 |
| z-score          | -0.02 (-0.15 to 0.11)  | 0.05 (-0.09 to 0.2)    | -0.07 (-0.27 to 0.12)  |              |       |
| <b>JAMB</b>      |                        |                        |                        |              |       |
| Raw score        | 8.33 (8.26 to 8.39)    | 8.32 (8.25 to 8.4)     | 0.00 (-0.10 to 0.10)   | 0.966        | 0.998 |
| z-score          | 0.01 (-0.23 to 0.24)   | 0 (-0.26 to 0.26)      | 0.01 (-0.34 to 0.36)   |              |       |
| <b>KYNU</b>      |                        |                        |                        |              |       |
| Raw score        | 8.89 (8.77 to 9.01)    | 9.12 (8.98 to 9.26)    | -0.23 (-0.42 to -0.05) | <b>0.015</b> | 0.532 |
| z-score          | -0.36 (-0.55 to -0.16) | 0.01 (-0.21 to 0.22)   | -0.37 (-0.66 to -0.07) |              |       |
| <b>LAIR2</b>     |                        |                        |                        |              |       |
| Raw score        | 4.81 (4.70 to 4.93)    | 4.97 (4.84 to 5.10)    | -0.16 (-0.33 to 0.01)  | <b>0.070</b> | 0.914 |
| z-score          | -0.09 (-0.20 to 0.01)  | 0.05 (-0.06 to 0.17)   | -0.14 (-0.30 to 0.01)  |              |       |
| <b>LAT</b>       |                        |                        |                        |              |       |
| Raw score        | 5.83 (5.52 to 6.14)    | 5.94 (5.60 to 6.29)    | -0.12 (-0.58 to 0.35)  | 0.627        | 0.998 |
| z-score          | -0.17 (-0.40 to 0.06)  | -0.08 (-0.34 to 0.17)  | -0.08 (-0.42 to 0.26)  |              |       |
| <b>LAYN</b>      |                        |                        |                        |              |       |
| Raw score        | 5.77 (5.70 to 5.83)    | 5.8 (5.72 to 5.87)     | -0.03 (-0.13 to 0.07)  | 0.569        | 0.995 |
| z-score          | 0.05 (-0.17 to 0.27)   | 0.14 (-0.10 to 0.39)   | -0.10 (-0.44 to 0.24)  |              |       |
| <b>LXN</b>       |                        |                        |                        |              |       |
| Raw score        | 2.41 (2.28 to 2.54)    | 2.33 (2.18 to 2.47)    | 0.08 (-0.11 to 0.27)   | 0.405        | 0.935 |
| z-score          | 0.64 (0.11 to 1.18)    | 0.31 (-0.28 to 0.9)    | 0.33 (-0.46 to 1.13)   |              |       |
| <b>MANF</b>      |                        |                        |                        |              |       |
| Raw score        | 6.47 (6.13 to 6.82)    | 6.75 (6.37 to 7.14)    | -0.28 (-0.8 to 0.24)   | 0.289        | 0.935 |
| z-score          | -0.16 (-0.46 to 0.14)  | 0.08 (-0.25 to 0.42)   | -0.24 (-0.69 to 0.21)  |              |       |
| <b>MATN3</b>     |                        |                        |                        |              |       |
| Raw score        | 12.98 (12.93 to 13.03) | 12.96 (12.9 to 13.02)  | 0.02 (-0.06 to 0.1)    | 0.636        | 0.998 |
| z-score          | 0.09 (-0.2 to 0.38)    | -0.02 (-0.34 to 0.3)   | 0.10 (-0.34 to 0.55)   |              |       |
| <b>MDGA1</b>     |                        |                        |                        |              |       |
| Raw score        | 5.04 (4.95 to 5.12)    | 5.03 (4.93 to 5.12)    | 0.01 (-0.12 to 0.13)   | 0.895        | 0.998 |
| z-score          | -0.04 (-0.16 to 0.09)  | -0.05 (-0.19 to 0.09)  | 0.01 (-0.17 to 0.20)   |              |       |
| <b>MSR1</b>      |                        |                        |                        |              |       |
| Raw score        | 6.83 (6.77 to 6.89)    | 6.95 (6.88 to 7.01)    | -0.11 (-0.2 to -0.03)  | <b>0.012</b> | 0.532 |
| z-score          | -0.21 (-0.34 to -0.08) | 0.04 (-0.10 to 0.18)   | -0.25 (-0.44 to -0.06) |              |       |
| <b>N2DL2</b>     |                        |                        |                        |              |       |
| Raw score        | 3.88 (3.81 to 3.94)    | 3.9 (3.82 to 3.97)     | -0.02 (-0.12 to 0.08)  | 0.714        | 0.998 |
| z-score          | 0.08 (-0.14 to 0.30)   | 0.14 (-0.10 to 0.38)   | -0.06 (-0.39 to 0.27)  |              |       |
| <b>NAAA</b>      |                        |                        |                        |              |       |
| Raw score        | 3.77 (3.63 to 3.9)     | 3.66 (3.51 to 3.8)     | 0.11 (-0.09 to 0.3)    | 0.274        | 0.935 |
| z-score          | 0.06 (-0.16 to 0.29)   | -0.12 (-0.37 to 0.13)  | 0.19 (-0.15 to 0.52)   |              |       |
| <b>NBL1</b>      |                        |                        |                        |              |       |
| Raw score        | 5.60 (5.57 to 5.62)    | 5.61 (5.58 to 5.64)    | -0.01 (-0.05 to 0.03)  | 0.478        | 0.942 |
| z-score          | -0.16 (-0.41 to 0.09)  | -0.03 (-0.30 to 0.25)  | -0.14 (-0.52 to 0.24)  |              |       |
| <b>NCAN</b>      |                        |                        |                        |              |       |
| Raw score        | 9.81 (9.78 to 9.84)    | 9.78 (9.74 to 9.82)    | 0.03 (-0.02 to 0.08)   | 0.219        | 0.935 |
| z-score          | -0.18 (-0.34 to -0.02) | -0.33 (-0.51 to -0.15) | 0.15 (-0.09 to 0.39)   |              |       |
| <b>NCDase</b>    |                        |                        |                        |              |       |
| Raw score        | 4.18 (4.12 to 4.25)    | 4.12 (4.05 to 4.19)    | 0.06 (-0.03 to 0.16)   | 0.184        | 0.935 |
| z-score          | 0.04 (-0.10 to 0.19)   | -0.1 (-0.25 to 0.06)   | 0.14 (-0.07 to 0.35)   |              |       |
| <b>NEP</b>       |                        |                        |                        |              |       |
| Raw score        | 3.08 (3.02 to 3.14)    | 3.05 (2.99 to 3.11)    | 0.03 (-0.05 to 0.12)   | 0.435        | 0.935 |
| z-score          | -0.02 (-0.11 to 0.07)  | -0.07 (-0.18 to 0.03)  | 0.06 (-0.09 to 0.20)   |              |       |
| <b>NMNAT1</b>    |                        |                        |                        |              |       |
| Raw score        | 4.80 (4.51 to 5.10)    | 4.6 (4.27 to 4.92)     | 0.21 (-0.23 to 0.64)   | 0.344        | 0.935 |
| z-score          | 0.48 (0.22 to 0.75)    | 0.29 (0.00 to 0.59)    | 0.19 (-0.21 to 0.59)   |              |       |
| <b>NrCAM</b>     |                        |                        |                        |              |       |
| Raw score        | 10.13 (10.11 to 10.16) | 10.1 (10.07 to 10.13)  | 0.03 (-0.01 to 0.08)   | 0.149        | 0.935 |
| z-score          | -0.14 (-0.41 to 0.13)  | -0.44 (-0.74 to -0.14) | 0.3 (-0.11 to 0.70)    |              |       |
| <b>NRP2</b>      |                        |                        |                        |              |       |
| Raw score        | 8.96 (8.93 to 8.98)    | 8.94 (8.92 to 8.97)    | 0.01 (-0.02 to 0.05)   | 0.448        | 0.935 |
| z-score          | -0.18 (-0.42 to 0.06)  | -0.32 (-0.59 to -0.05) | 0.14 (-0.22 to 0.50)   |              |       |
| <b>NTRK2</b>     |                        |                        |                        |              |       |
| Raw score        | 7.12 (7.08 to 7.16)    | 7.12 (7.07 to 7.16)    | 0.00 (-0.06 to 0.07)   | 0.906        | 0.998 |
| z-score          | -0.27 (-0.54 to 0.01)  | -0.29 (-0.6 to 0.01)   | 0.02 (-0.39 to 0.44)   |              |       |

Exercise and neurology biomarkers in childhood

Table S6A. (Continued)

|                   |                        |                        |                        |              |       |
|-------------------|------------------------|------------------------|------------------------|--------------|-------|
| <b>NTRK3</b>      |                        |                        |                        |              |       |
| Raw score         | 7.47 (7.42 to 7.52)    | 7.47 (7.41 to 7.52)    | 0.00 (-0.07 to 0.08)   | 0.908        | 0.998 |
| z-score           | -0.18 (-0.43 to 0.06)  | -0.21 (-0.47 to 0.06)  | 0.02 (-0.34 to 0.38)   |              |       |
| <b>PDGFRalpha</b> |                        |                        |                        |              |       |
| Raw score         | 5.86 (5.8 to 5.91)     | 5.85 (5.79 to 5.92)    | 0.00 (-0.08 to 0.09)   | 0.945        | 0.998 |
| z-score           | 0.04 (-0.19 to 0.28)   | 0.03 (-0.23 to 0.29)   | 0.01 (-0.34 to 0.37)   |              |       |
| <b>PLXNB1</b>     |                        |                        |                        |              |       |
| Raw score         | 1.93 (1.88 to 1.99)    | 1.89 (1.83 to 1.95)    | 0.05 (-0.03 to 0.13)   | 0.251        | 0.935 |
| z-score           | -0.09 (-0.31 to 0.13)  | -0.28 (-0.53 to -0.04) | 0.19 (-0.14 to 0.52)   |              |       |
| <b>PLXNB3</b>     |                        |                        |                        |              |       |
| Raw score         | 4.21 (4.12 to 4.3)     | 4.33 (4.23 to 4.43)    | -0.12 (-0.25 to 0.01)  | <b>0.068</b> | 0.914 |
| z-score           | -0.31 (-0.43 to -0.19) | -0.14 (-0.28 to -0.01) | -0.17 (-0.35 to 0.01)  |              |       |
| <b>PRTG</b>       |                        |                        |                        |              |       |
| Raw score         | 7.19 (7.12 to 7.26)    | 7.13 (7.06 to 7.21)    | 0.06 (-0.05 to 0.16)   | 0.288        | 0.935 |
| z-score           | -0.01 (-0.23 to 0.21)  | -0.19 (-0.43 to 0.06)  | 0.18 (-0.15 to 0.50)   |              |       |
| <b>PVR</b>        |                        |                        |                        |              |       |
| Raw score         | 8.84 (8.80 to 8.89)    | 8.84 (8.79 to 8.90)    | 0 (-0.07 to 0.07)      | 0.997        | 0.998 |
| z-score           | -0.08 (-0.25 to 0.09)  | -0.08 (-0.27 to 0.11)  | 0 (-0.26 to 0.26)      |              |       |
| <b>RGMA</b>       |                        |                        |                        |              |       |
| Raw score         | 11.05 (11.00 to 11.11) | 11.05 (10.99 to 11.11) | 0.00 (-0.07 to 0.08)   | 0.934        | 0.998 |
| z-score           | -0.07 (-0.29 to 0.15)  | -0.09 (-0.33 to 0.16)  | 0.01 (-0.32 to 0.35)   |              |       |
| <b>RGMB</b>       |                        |                        |                        |              |       |
| Raw score         | 6.27 (6.21 to 6.34)    | 6.3 (6.23 to 6.38)     | -0.03 (-0.13 to 0.07)  | 0.536        | 0.992 |
| z-score           | -0.06 (-0.32 to 0.20)  | 0.06 (-0.22 to 0.35)   | -0.12 (-0.51 to 0.26)  |              |       |
| <b>ROBO2</b>      |                        |                        |                        |              |       |
| Raw score         | 6.98 (6.92 to 7.04)    | 7.02 (6.95 to 7.09)    | -0.04 (-0.13 to 0.06)  | 0.425        | 0.935 |
| z-score           | -0.23 (-0.45 to 0.00)  | -0.09 (-0.34 to 0.16)  | -0.14 (-0.47 to 0.20)  |              |       |
| <b>RSPO1</b>      |                        |                        |                        |              |       |
| Raw score         | 1.93 (1.86 to 2.00)    | 1.97 (1.89 to 2.04)    | -0.04 (-0.14 to 0.06)  | 0.445        | 0.935 |
| z-score           | -0.18 (-0.40 to 0.04)  | -0.06 (-0.30 to 0.18)  | -0.13 (-0.45 to 0.20)  |              |       |
| <b>SCARA5</b>     |                        |                        |                        |              |       |
| Raw score         | 9.27 (9.21 to 9.32)    | 9.29 (9.23 to 9.35)    | -0.03 (-0.11 to 0.05)  | 0.499        | 0.945 |
| z-score           | -0.04 (-0.3 to 0.23)   | 0.1 (-0.20 to 0.40)    | -0.14 (-0.54 to 0.27)  |              |       |
| <b>SCARB2</b>     |                        |                        |                        |              |       |
| Raw score         | 4.14 (4.09 to 4.2)     | 4.24 (4.18 to 4.31)    | -0.1 (-0.19 to -0.02)  | <b>0.018</b> | 0.532 |
| z-score           | 0 (-0.21 to 0.21)      | 0.38 (0.15 to 0.61)    | -0.38 (-0.69 to -0.07) |              |       |
| <b>SCARF2</b>     |                        |                        |                        |              |       |
| Raw score         | 7.13 (7.07 to 7.20)    | 7.1 (7.03 to 7.17)     | 0.03 (-0.06 to 0.13)   | 0.486        | 0.942 |
| z-score           | -0.07 (-0.32 to 0.18)  | -0.2 (-0.48 to 0.08)   | 0.13 (-0.24 to 0.51)   |              |       |
| <b>sFRP3</b>      |                        |                        |                        |              |       |
| Raw score         | 3.22 (3.08 to 3.37)    | 3.31 (3.14 to 3.47)    | -0.08 (-0.31 to 0.14)  | 0.455        | 0.935 |
| z-score           | -0.23 (-0.42 to -0.04) | -0.12 (-0.33 to 0.09)  | -0.11 (-0.39 to 0.17)  |              |       |
| <b>SIGLEC1</b>    |                        |                        |                        |              |       |
| Raw score         | 6.57 (6.49 to 6.66)    | 6.65 (6.56 to 6.74)    | -0.07 (-0.20 to 0.05)  | 0.238        | 0.935 |
| z-score           | 0.01 (-0.17 to 0.19)   | 0.17 (-0.03 to 0.37)   | -0.16 (-0.43 to 0.11)  |              |       |
| <b>Siglec9</b>    |                        |                        |                        |              |       |
| Raw score         | 5.09 (5.05 to 5.13)    | 5.09 (5.04 to 5.13)    | 0.01 (-0.06 to 0.07)   | 0.856        | 0.998 |
| z-score           | -0.07 (-0.2 to 0.07)   | -0.09 (-0.24 to 0.06)  | 0.02 (-0.19 to 0.22)   |              |       |
| <b>SKR3</b>       |                        |                        |                        |              |       |
| Raw score         | 6.50 (6.45 to 6.55)    | 6.50 (6.45 to 6.56)    | -0.01 (-0.08 to 0.07)  | 0.865        | 0.998 |
| z-score           | 0.00 (-0.20 to 0.19)   | 0.02 (-0.19 to 0.24)   | -0.03 (-0.31 to 0.26)  |              |       |
| <b>SMOC2</b>      |                        |                        |                        |              |       |
| Raw score         | 8.92 (8.85 to 8.98)    | 8.93 (8.85 to 9.00)    | -0.01 (-0.12 to 0.10)  | 0.847        | 0.998 |
| z-score           | 0.06 (-0.16 to 0.28)   | 0.09 (-0.15 to 0.33)   | -0.03 (-0.36 to 0.30)  |              |       |
| <b>SMPD1</b>      |                        |                        |                        |              |       |
| Raw score         | 4.68 (4.61 to 4.74)    | 4.61 (4.54 to 4.69)    | 0.06 (-0.04 to 0.17)   | 0.231        | 0.935 |
| z-score           | 0.22 (0.00 to 0.43)    | 0.02 (-0.22 to 0.26)   | 0.19 (-0.13 to 0.52)   |              |       |
| <b>SPOCK1</b>     |                        |                        |                        |              |       |
| Raw score         | 2.82 (2.78 to 2.86)    | 2.87 (2.82 to 2.92)    | -0.05 (-0.11 to 0.02)  | 0.139        | 0.935 |
| z-score           | -0.14 (-0.33 to 0.06)  | 0.09 (-0.13 to 0.30)   | -0.22 (-0.52 to 0.07)  |              |       |
| <b>THY1</b>       |                        |                        |                        |              |       |
| Raw score         | 10.60 (10.56 to 10.64) | 10.58 (10.54 to 10.63) | 0.02 (-0.04 to 0.08)   | 0.580        | 0.995 |
| z-score           | 0.25 (-0.02 to 0.52)   | 0.14 (-0.16 to 0.44)   | 0.11 (-0.29 to 0.52)   |              |       |

## Exercise and neurology biomarkers in childhood

**Table S6A.** (Continued)

|           |                       |                        |                       |       |       |
|-----------|-----------------------|------------------------|-----------------------|-------|-------|
| TMPRSS5   |                       |                        |                       |       |       |
| Raw score | 3.31 (3.26 to 3.36)   | 3.25 (3.19 to 3.3)     | 0.06 (-0.01 to 0.14)  | 0.115 | 0.935 |
| z-score   | -0.04 (-0.22 to 0.14) | -0.26 (-0.47 to -0.06) | 0.22 (-0.06 to 0.5)   |       |       |
| TNFRSF12A |                       |                        |                       |       |       |
| Raw score | 5.27 (5.2 to 5.35)    | 5.27 (5.18 to 5.36)    | 0 (-0.12 to 0.12)     | 0.976 | 0.998 |
| z-score   | -0.15 (-0.42 to 0.12) | -0.16 (-0.45 to 0.14)  | 0.01 (-0.4 to 0.41)   |       |       |
| TNFRSF21  |                       |                        |                       |       |       |
| Raw score | 8.58 (8.54 to 8.62)   | 8.57 (8.53 to 8.61)    | 0.01 (-0.05 to 0.06)  | 0.781 | 0.998 |
| z-score   | -0.14 (-0.35 to 0.07) | -0.18 (-0.42 to 0.05)  | 0.04 (-0.27 to 0.36)  |       |       |
| TNR       |                       |                        |                       |       |       |
| Raw score | 4.97 (4.9 to 5.04)    | 4.99 (4.91 to 5.07)    | -0.02 (-0.12 to 0.09) | 0.748 | 0.998 |
| z-score   | 0 (-0.19 to 0.19)     | 0.05 (-0.17 to 0.26)   | -0.05 (-0.33 to 0.24) |       |       |
| UNC5C     |                       |                        |                       |       |       |
| Raw score | 5.05 (5 to 5.11)      | 5.07 (5.01 to 5.14)    | -0.02 (-0.1 to 0.06)  | 0.651 | 0.998 |
| z-score   | -0.12 (-0.28 to 0.03) | -0.07 (-0.24 to 0.1)   | -0.05 (-0.29 to 0.18) |       |       |
| VWC2      |                       |                        |                       |       |       |
| Raw score | 6.26 (6.18 to 6.33)   | 6.31 (6.23 to 6.4)     | -0.06 (-0.17 to 0.06) | 0.306 | 0.935 |
| z-score   | -0.05 (-0.26 to 0.16) | 0.11 (-0.12 to 0.34)   | -0.16 (-0.48 to 0.15) |       |       |
| WFIKKN1   |                       |                        |                       |       |       |
| Raw score | 3.73 (3.68 to 3.79)   | 3.79 (3.73 to 3.85)    | -0.06 (-0.14 to 0.02) | 0.153 | 0.935 |
| z-score   | -0.06 (-0.22 to 0.09) | 0.11 (-0.07 to 0.28)   | -0.17 (-0.41 to 0.06) |       |       |

z Score values indicate how many standard deviations have the post-intervention values changed with respect to the baseline mean and standard deviation. E.g., a 0.50 z Score means that the mean value at post-intervention is 0.50 standard deviations higher than the mean value at baseline, indicating a positive change, with negative values indicating the opposite. Values are expressed as mean (95% CI). Analyses were adjusted for baseline values. N=87 participants. Raw scores values are expressed in Normalized Protein eXpression (NPX) units. This means that a high NPX value equals a high protein concentration. Because NPX is in a log<sub>2</sub> scale, a 1 NPX difference means a doubling of protein concentration. If needed NPX values can be converted into linear scale: 2<sup>NPX</sup>= linear NPX. Abbreviations: *p*<sub>FDR</sub>= adjusted for multiple comparisons using false discovery rate.
